# Supplementary material
Source: PubMed Central journal article supplement (PMC8174581)
Supplement: NIHMS1701811-supplement-supinfo.pdf [file NIHMS1701811-supplement-supinfo.pdf]

## Supplement to “Geriatric Syndromes and Atrial Fibrillation: Prevalence and Association with Anticoagulant use in a National Cohort of Older Americans”

Sachin J. Shah, MD, MPH (1); Margaret C. Fang, MD, MPH (1); Sun Y. Jeon, MS, PhD (2); Steven E. Gregorich, PhD (3); Kenneth E. Covinsky, MD, MPH (2)

### Contents

|                                                                                                                                                                                                                                                               |    |
|---------------------------------------------------------------------------------------------------------------------------------------------------------------------------------------------------------------------------------------------------------------|----|
| 1. Supplemental Figure S1: Cohort flow diagram .....                                                                                                                                                                                                          | 2  |
| 2. Supplementary Table S2: Prevalence of individual activities of daily living, use of assistive devices, and instrumental activities of daily living in adults 65 years and older with atrial fibrillation in a nationally representative sample, 2014 ..... | 3  |
| 3. Supplemental Table S3: Functional form of the association between the count of geriatric syndromes and anticoagulant use .....                                                                                                                             | 5  |
| 4. Supplemental Table S4: Count of geriatric syndromes and anticoagulant use, sensitivity analysis limiting population to those where guidelines recommend anticoagulant use .....                                                                            | 6  |
| 5. Supplemental Table S5: Average marginal effect of individual geriatric syndromes on anticoagulant use adjusted for stroke risk, tabular format.....                                                                                                        | 7  |
| 6. Supplemental Table S6: Individual geriatric syndromes and anticoagulant use, sensitivity analysis limiting population to those where guidelines recommend anticoagulant use.....                                                                           | 8  |
| 7. Supplemental Table S7: Concordance of self-reported anticoagulant use and claims-based anticoagulant use: Sensitivity analysis on self-reported anticoagulant use.....                                                                                     | 9  |
| 8. Supplemental Table S8: STROBE Statement—Checklist of items that should be included in reports of <i>cross-sectional studies</i> .....                                                                                                                      | 10 |

1. Supplemental Figure S1: Cohort flow diagram

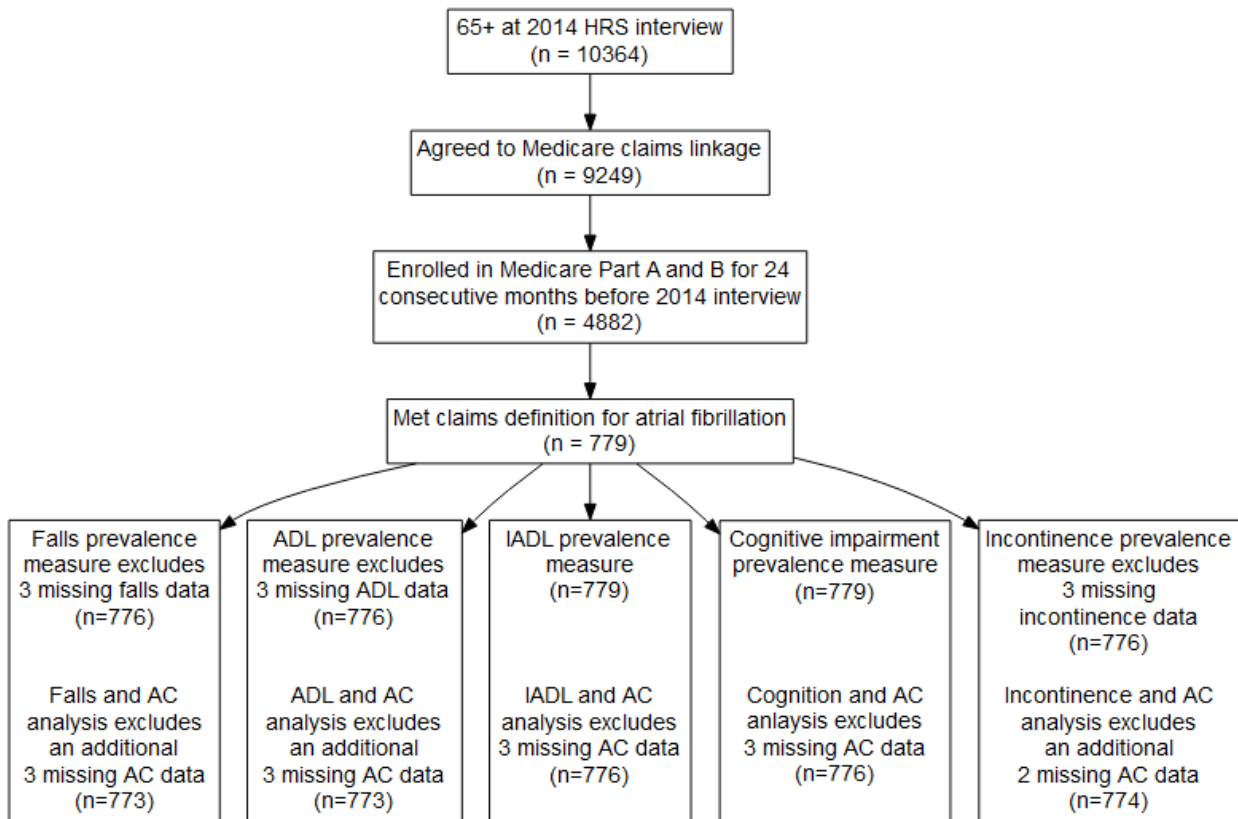

Legend

HRS – Health and Retirement Study; AC – anticoagulation; ADL – activity of daily living; IADL – instrumental activity of daily living

2. Supplementary Table S2: Prevalence of individual activities of daily living, use of assistive devices, and instrumental activities of daily living in adults 65 years and older with atrial fibrillation in a nationally representative sample, 2014

|                                     | <b>Prevalence<br/>(95% CI)</b> |
|-------------------------------------|--------------------------------|
| <b>Bathing (ADL)</b>                |                                |
| No impairment                       | 78% (75-82%)                   |
| Difficulty                          | 4% (3-6%)                      |
| Dependence                          | 17% (14-21%)                   |
| <b>Getting out of bed (ADL)</b>     |                                |
| No impairment                       | 85% (82-87%)                   |
| Difficulty                          | 5% (4-7%)                      |
| Dependence                          | 10% (8-13%)                    |
| <b>Dressing (ADL)</b>               |                                |
| No impairment                       | 76% (73-79%)                   |
| Difficulty                          | 5% (4-7%)                      |
| Dependence                          | 18% (15-22%)                   |
| <b>Eating (ADL)</b>                 |                                |
| No impairment                       | 89% (86-92%)                   |
| Difficulty                          | 3% (2-5%)                      |
| Dependence                          | 8% (6-11%)                     |
| <b>Toileting (ADL)</b>              |                                |
| No impairment                       | 83% (80-86%)                   |
| Difficulty                          | 9% (7-12%)                     |
| Dependence                          | 7% (5-10%)                     |
| <b>Walking (ADL)</b>                |                                |
| No impairment                       | 79% (75-83%)                   |
| Difficulty                          | 9% (7-11%)                     |
| Dependence                          | 12% (9-16%)                    |
| Use of assistive devices in walking | 42% (38-47%)                   |
| <b>Grocery shopping (IADL)</b>      |                                |
| No impairment                       | 74% (70-78%)                   |
| Difficulty                          | 11% (9-15%)                    |
| Dependence                          | 15% (12-18%)                   |
| <b>Preparing meals (IADL)</b>       |                                |
| No impairment                       | 73% (70-76%)                   |
| Difficulty                          | 16% (13-20%)                   |
| Dependence                          | 10% (8-13%)                    |
| <b>Taking medications (IADL)</b>    |                                |
| No impairment                       | 90% (88-93%)                   |
| Difficulty                          | 4% (2-5%)                      |

|                        |              |
|------------------------|--------------|
| Dependence             | 6% (4-8%)    |
| Managing money (IADL)  |              |
| No impairment          | 78% (75-82%) |
| Difficulty             | 6% (5-8%)    |
| Dependence             | 15% (12-19%) |
| Using the phone (IADL) |              |
| No impairment          | 86% (82-89%) |
| Difficulty             | 4% (2-5%)    |
| Dependence             | 11% (8-14%)  |

### 3. Supplemental Table S3: Functional form of the association between the count of geriatric syndromes and anticoagulant use

We examined various functional forms to determine the association between the count of geriatric syndrome and anticoagulant use. First, we examined the relationship visually; based on visual inspection, the relationship appeared linear. Next, we determined the best fit by measuring the Bayesian information criterion (BIC) for each functional form (linear, exponential, logarithmic, and categorical). Below we present the BIC for each functional form. Continuous had the lowest BIC, indicating the best fit

| <b>Functional form</b> | <b>BIC (lower is better)</b> |
|------------------------|------------------------------|
| Linear                 | 982.5                        |
| Exponential            | 987.1                        |
| Logarithmic            | 989.0                        |
| Categorical            | 1006.4                       |

4. Supplemental Table S4: Count of geriatric syndromes and anticoagulant use, sensitivity analysis limiting population to those where guidelines recommend anticoagulant use

In this sensitivity analysis, we re-examine the association between the count of geriatric syndromes and anticoagulant use limiting the population to those where contemporary guidelines (i.e., 2014 AHA/ACC/HRS guidelines) recommend anticoagulant use.

| <b>Analysis</b>                                                                       | <b>Main manuscript</b><br>(population: all older adults with AF) | <b>Sensitivity analysis</b><br>(population: older adults AF who meet guideline recommendations for anticoagulant use) |
|---------------------------------------------------------------------------------------|------------------------------------------------------------------|-----------------------------------------------------------------------------------------------------------------------|
| Association between the count of geriatric syndromes and anticoagulant use (Figure 1) | -3.66%<br>(95% CI -5.93 to -1.38%)                               | -3.73%<br>(95% CI -6.01 to -1.44%)                                                                                    |

5. Supplemental Table S5: Average marginal effect of individual geriatric syndromes on anticoagulant use adjusted for stroke risk, tabular format

The average marginal effect of individual geriatric syndromes on anticoagulant use adjusted for stroke risk

| <b>Syndrome</b>    | <b>Level</b>                       | <b>Predicted anticoagulant use (95% confidence interval)</b> | <b>Difference from reference level (95% confidence interval)</b> |
|--------------------|------------------------------------|--------------------------------------------------------------|------------------------------------------------------------------|
| Falls              | No falls                           | 0.68 (0.64 to 0.73)                                          | Ref                                                              |
| Falls              | Noninjurious falls                 | 0.67 (0.61 to 0.73)                                          | -0.017 (-0.093 to 0.060)                                         |
| Falls              | Injurious falls                    | 0.62 (0.54 to 0.69)                                          | -0.067 (-0.156 to 0.022)                                         |
| ADL                | ADL intact                         | 0.70 (0.66 to 0.74)                                          | Ref                                                              |
| ADL                | ADL difficulty                     | 0.61 (0.52 to 0.70)                                          | -0.094 (-0.193 to 0.006)                                         |
| ADL                | ADL dependent                      | 0.62 (0.55 to 0.68)                                          | -0.084 (-0.162 to -0.006)                                        |
| IADL               | IADL intact                        | 0.69 (0.65 to 0.74)                                          | Ref                                                              |
| IADL               | IADL difficulty                    | 0.68 (0.59 to 0.76)                                          | -0.016 (-0.112 to 0.079)                                         |
| IADL               | IADL dependent                     | 0.60 (0.54 to 0.67)                                          | -0.090 (-0.166 to -0.014)                                        |
| Cognitive function | Cognitively intact                 | 0.71 (0.67 to 0.75)                                          | Ref                                                              |
| Cognitive function | Cognitive impairment, not dementia | 0.63 (0.57 to 0.70)                                          | -0.079 (-0.157 to -0.001)                                        |
| Cognitive function | Dementia                           | 0.51 (0.42 to 0.60)                                          | -0.203 (-0.301 to -0.105)                                        |
| Incontinence       | Not incontinent                    | 0.67 (0.63 to 0.72)                                          | Ref                                                              |
| Incontinence       | Incontinent                        | 0.65 (0.60 to 0.70)                                          | -0.023 (-0.091 to 0.045)                                         |

6. Supplemental Table S6: Individual geriatric syndromes and anticoagulant use, sensitivity analysis limiting population to those where guidelines recommend anticoagulant use

| <b>Syndrome</b>    | <b>Level</b>                      | <b>Difference from reference level from main manuscript</b><br>(population: all older adults with AF) | <b>Difference from reference level sensitivity analysis</b><br>(population: older adults AF who meet guideline recommendations for anticoagulant use) |
|--------------------|-----------------------------------|-------------------------------------------------------------------------------------------------------|-------------------------------------------------------------------------------------------------------------------------------------------------------|
| ADL                | ADL intact                        | Ref                                                                                                   | Ref                                                                                                                                                   |
| ADL                | ADL dependent                     | -8.4% (95% CI -16.2 to -0.6%)                                                                         | -8.6% (95% CI -16.5 to -0.8%)                                                                                                                         |
| ADL                | ADL difficulty                    | -9.4% (95% CI -19.3 to 0.6%)                                                                          | -9.2% (95% CI -19.2 to 0.8%)                                                                                                                          |
| Cognitive function | Cognitively intact                | Ref                                                                                                   | Ref                                                                                                                                                   |
| Cognitive function | Cognitive impairment not dementia | -7.9% (95% CI -15.7 to -0.1%)                                                                         | -7.9% (95% CI -15.7 to -0.1%)                                                                                                                         |
| Cognitive function | Dementia                          | -20.3% (95% CI -30.1 to -10.5%)                                                                       | -20.6% (95% CI -30.5 to -10.7%)                                                                                                                       |
| Falls              | No falls                          | Ref                                                                                                   | Ref                                                                                                                                                   |
| Falls              | Injurious falls                   | -6.7% (95% CI -15.6 to 2.2%)                                                                          | -6.9% (95% CI -15.8 to 2.1%)                                                                                                                          |
| Falls              | Noninjurious falls                | -1.7% (95% CI -9.3 to 6%)                                                                             | -1.3% (95% CI -9 to 6.5%)                                                                                                                             |
| IADL               | IADL intact                       | Ref                                                                                                   | Ref                                                                                                                                                   |
| IADL               | IADL dependent                    | -9% (95% CI -16.6 to -1.4%)                                                                           | -9.4% (95% CI -17 to -1.7%)                                                                                                                           |
| IADL               | IADL difficulty                   | -1.6% (95% CI -11.2 to 7.9%)                                                                          | -2.3% (95% CI -12 to 7.3%)                                                                                                                            |
| Incontinence       | Not incontinent                   | Ref                                                                                                   | Ref                                                                                                                                                   |
| Incontinence       | Incontinent                       | -2.3% (95% CI -9.1 to 4.5%)                                                                           | -2.7% (95% CI -9.5 to 4.1%)                                                                                                                           |



7. Supplemental Table S7: Concordance of self-reported anticoagulant use and claims-based anticoagulant use: Sensitivity analysis on self-reported anticoagulant use

In this study, we used a self-reported measure of anticoagulant use (“Do you regularly take prescription medications other than aspirin to thin your blood or to prevent blood clots?”). We sought to examine if self-reported use of anticoagulants mirrored Medicare Part D claims for anticoagulants. To accomplish this, we examined a subset of HRS participants with atrial fibrillation and continuous enrollment in Medicare Part D for the 12 months preceding their 2014 interview (including the month of the interview), and who answered the question about anticoagulant use. In this subset (n=505 of 771 total), we examined the concordance between self-reported anticoagulant use and claims for oral anticoagulants, including warfarin, dabigatran, rivaroxaban, apixaban, and edoxaban. We found 83% concordance, and Kappa of 0.63, indicating substantial agreement between the two measures of anticoagulant use.

|        |       | Self-report    |                |                |
|--------|-------|----------------|----------------|----------------|
|        |       | No AC          | AC             | Total          |
| Claims | No AC | 140<br>(27.7%) | 62<br>(12.3%)  | 202<br>(40.0%) |
|        | AC    | 26<br>(5.1%)   | 277<br>(54.9%) | 303<br>(60.0%) |
| Total  |       | 166<br>(32.9%) | 339<br>(67.1%) | 505<br>(100%)  |

\* parenthetical percent is the percent of total population (n=505)

8. Supplemental Table S8: STROBE Statement—Checklist of items that should be included in reports of *cross-sectional studies*

|                              | Item No | Recommendation                                                                                                                                                                       | Reported on page |
|------------------------------|---------|--------------------------------------------------------------------------------------------------------------------------------------------------------------------------------------|------------------|
| <b>Title and abstract</b>    | 1       | (a) Indicate the study's design with a commonly used term in the title or the abstract                                                                                               | 1                |
|                              |         | (b) Provide in the abstract an informative and balanced summary of what was done and what was found                                                                                  | 2                |
| <b>Introduction</b>          |         |                                                                                                                                                                                      |                  |
| Background/rationale         | 2       | Explain the scientific background and rationale for the investigation being reported                                                                                                 | 4,5              |
| Objectives                   | 3       | State specific objectives, including any prespecified hypotheses                                                                                                                     | 5                |
| <b>Methods</b>               |         |                                                                                                                                                                                      |                  |
| Study design                 | 4       | Present key elements of study design early in the paper                                                                                                                              | 5                |
| Setting                      | 5       | Describe the setting, locations, and relevant dates, including periods of recruitment, exposure, follow-up, and data collection                                                      | 5                |
| Participants                 | 6       | (a) Give the eligibility criteria, and the sources and methods of selection of participants                                                                                          | 5                |
| Variables                    | 7       | Clearly define all outcomes, exposures, predictors, potential confounders, and effect modifiers. Give diagnostic criteria, if applicable                                             | 6-8              |
| Data sources/<br>measurement | 8*      | For each variable of interest, give sources of data and details of methods of assessment (measurement). Describe comparability of assessment methods if there is more than one group | 7,8              |
| Bias                         | 9       | Describe any efforts to address potential sources of bias                                                                                                                            | 8                |
| Study size                   | 10      | Explain how the study size was arrived at                                                                                                                                            | Appendix         |
| Quantitative variables       | 11      | Explain how quantitative variables were handled in the analyses. If applicable, describe which groupings were chosen and why                                                         | 8                |
| Statistical methods          | 12      | (a) Describe all statistical methods, including those used to control for confounding                                                                                                | 8                |
|                              |         | (b) Describe any methods used to examine subgroups and interactions                                                                                                                  | 8                |
|                              |         | (c) Explain how missing data were addressed                                                                                                                                          | 8, appendix      |
|                              |         | (d) If applicable, describe analytical methods taking account of sampling strategy                                                                                                   | 8                |

|                          |     |                                                                                                                                                                                                              |                 |
|--------------------------|-----|--------------------------------------------------------------------------------------------------------------------------------------------------------------------------------------------------------------|-----------------|
|                          |     | (e) Describe any sensitivity analyses                                                                                                                                                                        | 8               |
| <b>Results</b>           |     |                                                                                                                                                                                                              |                 |
| Participants             | 13* | (a) Report numbers of individuals at each stage of study—eg numbers potentially eligible, examined for eligibility, confirmed eligible, included in the study, completing follow-up, and analysed            | Appendix        |
|                          |     | (b) Give reasons for non-participation at each stage                                                                                                                                                         | Appendix        |
|                          |     | (c) Consider use of a flow diagram                                                                                                                                                                           | Appendix        |
| Descriptive data         | 14* | (a) Give characteristics of study participants (eg demographic, clinical, social) and information on exposures and potential confounders                                                                     | 8, 9, Table 1   |
|                          |     | (b) Indicate number of participants with missing data for each variable of interest                                                                                                                          | 8, 9, Table 1   |
| Outcome data             | 15* | Report numbers of outcome events or summary measures                                                                                                                                                         | 9, Table 2      |
| Main results             | 16  | (a) Give unadjusted estimates and, if applicable, confounder-adjusted estimates and their precision (eg, 95% confidence interval). Make clear which confounders were adjusted for and why they were included | 8, 9, 10        |
|                          |     | (b) Report category boundaries when continuous variables were categorized                                                                                                                                    | n/a             |
|                          |     | (c) If relevant, consider translating estimates of relative risk into absolute risk for a meaningful time period                                                                                             | 9, Fig 1, Fig 2 |
| Other analyses           | 17  | Report other analyses done—eg analyses of subgroups and interactions, and sensitivity analyses                                                                                                               | Appendix        |
| <b>Discussion</b>        |     |                                                                                                                                                                                                              |                 |
| Key results              | 18  | Summarise key results with reference to study objectives                                                                                                                                                     | 10              |
| Limitations              | 19  | Discuss limitations of the study, taking into account sources of potential bias or imprecision. Discuss both direction and magnitude of any potential bias                                                   | 11, 12          |
| Interpretation           | 20  | Give a cautious overall interpretation of results considering objectives, limitations, multiplicity of analyses, results from similar studies, and other relevant evidence                                   | 10, 11          |
| Generalisability         | 21  | Discuss the generalisability (external validity) of the study results                                                                                                                                        | 12              |
| <b>Other information</b> |     |                                                                                                                                                                                                              |                 |
| Funding                  | 22  | Give the source of funding and the role of the funders for the present study and, if applicable, for the original study on which the present article is based                                                | 13              |

\*Give information separately for exposed and unexposed groups.
